# Supplementary material for: Effect of INTELLiVENT-ASV versus Conventional Ventilation on Ventilation Intensity in Patients with COVID-19 ARDS—An Observational Study
Source: MDPI journal article supplement (doi:10.3390/jcm10225409), 2021-11-19
Supplement: s1 [file s1]

*Supplement with*

# **Effect of INTELLiVENT-ASV versus Conventional Ventilation on Ventilation Intensity in Patients with COVID-19 ARDS—an observational study**

**Laura A. Buiteman-Kruizinga, Hassan E. Mkadmi, Ary Serpa Neto, Matthijs D. Kruizinga, Michela Botta, Marcus J. Schultz, Frederique Paulus and Pim L.J. van der Heiden**

|                  |    |
|------------------|----|
| Figure S1.....   | 2  |
| Figure S2.....   | 3  |
| Figure S3.....   | 4  |
| Figure S4.....   | 5  |
| Figure S5.....   | 7  |
| Figure S6.....   | 8  |
| Figure S7.....   | 9  |
| Table S1a-h..... | 10 |

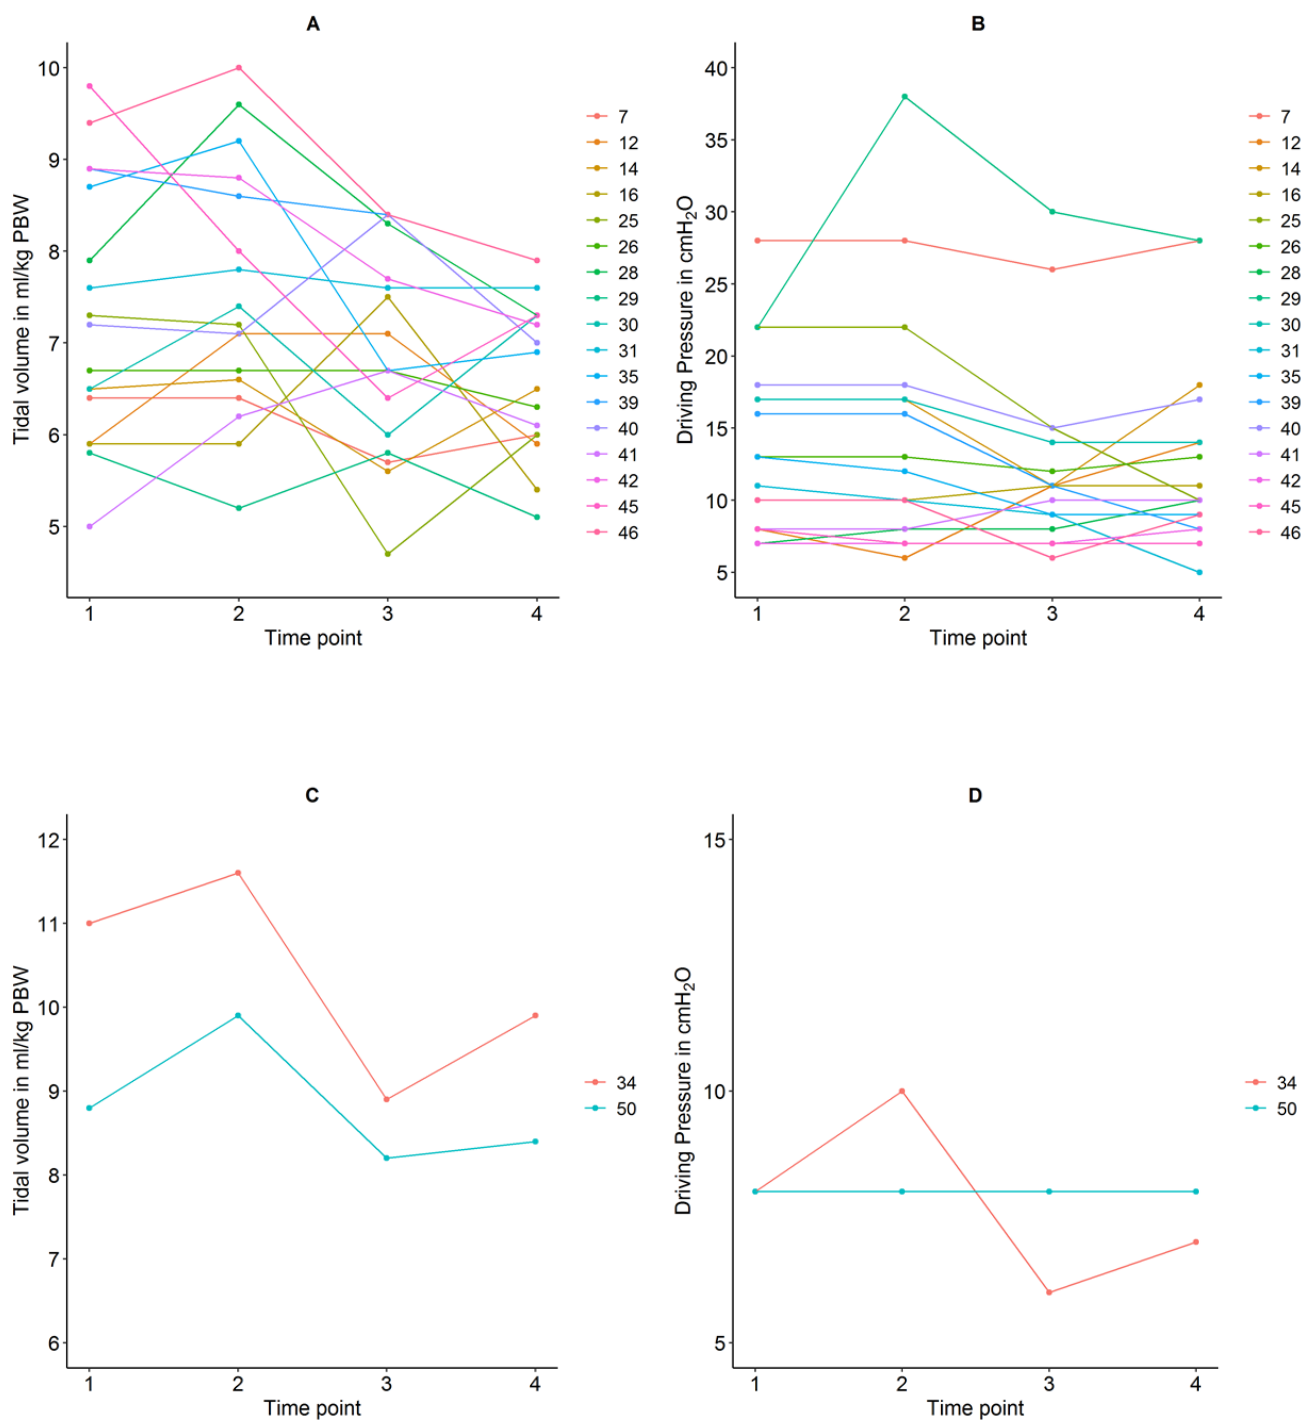

**Figure S1.** Plot of a subset of patients of individual changes in  $V_T$  and  $\Delta P$ . Plot of a subset of patients with a decrease in  $V_T$  with INTELLiVENT-ASV, as determined 1 hour before conversion and 2 hours after conversion with (a) a decrease to a  $V_T$  below 8 ml/kg PBW; (b) the effect on  $\Delta P$  in the same patients; (c) a decrease to a  $V_T$  above 8ml/kg PBW; and (d) the effect on  $\Delta P$  in the same patients. Timepoints 1 and 2 are with conventional ventilation, and 3 and 4 are with INTELLiVENT-ASV.

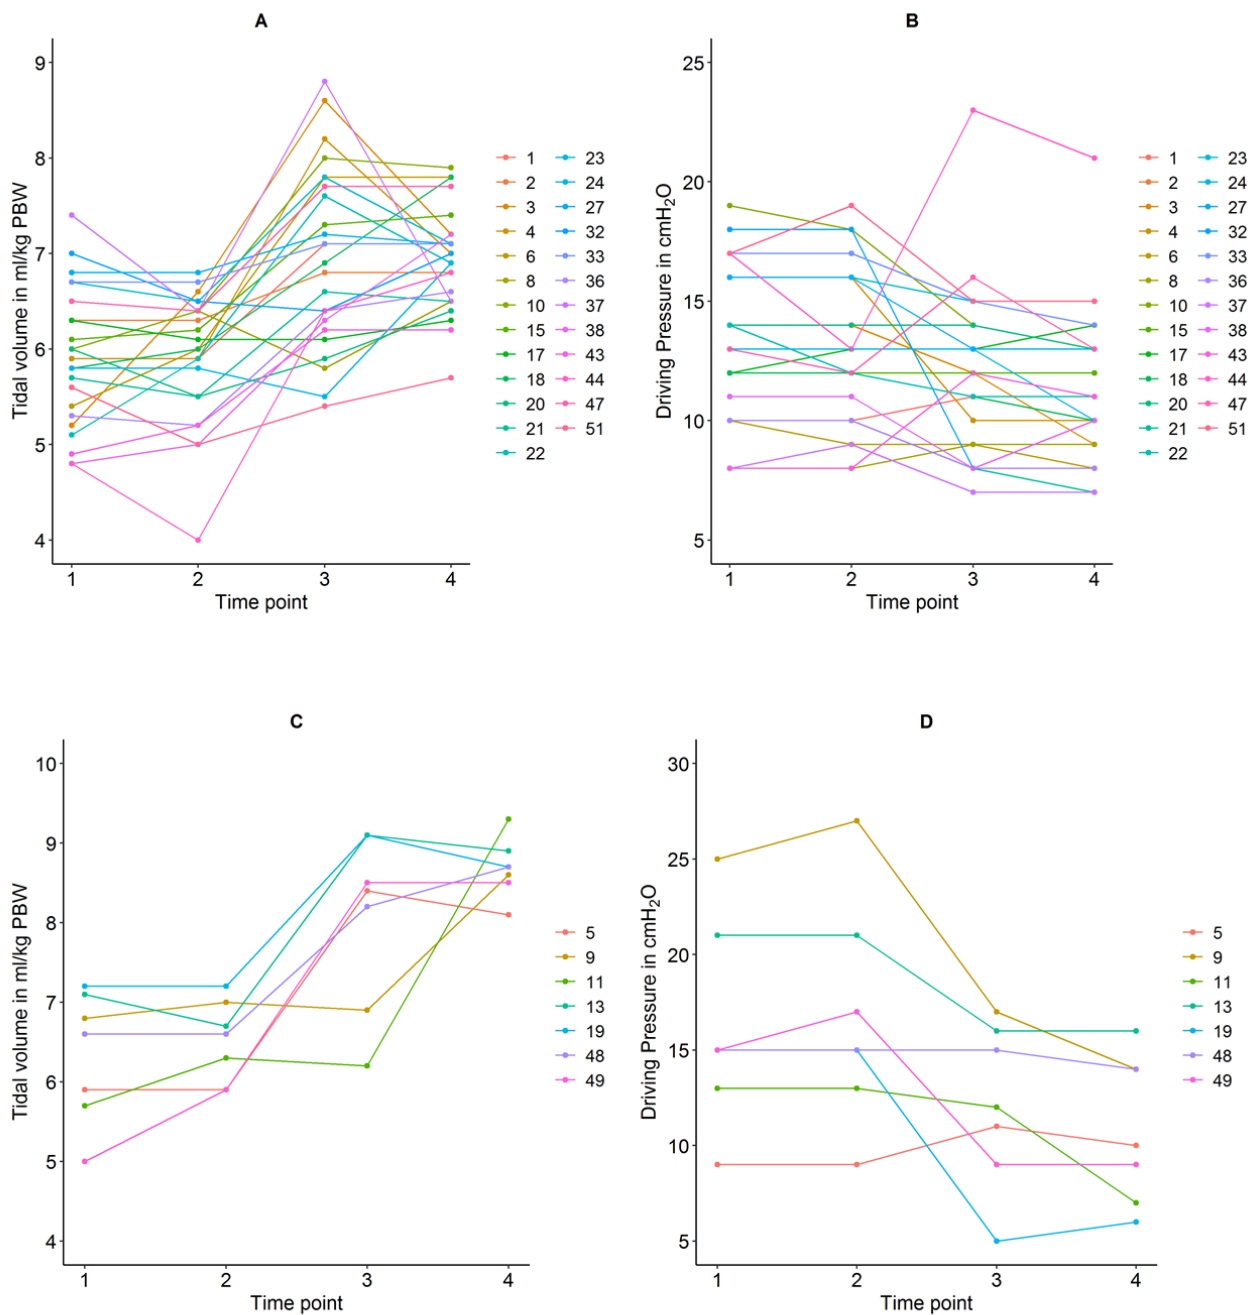

**Figure S2.** Plot of a subset of patients of individual changes in  $V_T$  and  $\Delta P$ . Plot of a subset of patients with an increase in  $V_T$  with INTELLiVENT-ASV, as determined 1 hour before conversion and 2 hours after conversion with (a) an increase to a  $V_T$  below 8 ml/kg PBW; (b) the effect on  $\Delta P$  in the same patients; (c) an increase to a  $V_T$  above 8ml/kg PBW; and (d) the effect on  $\Delta P$  in the same patients. Timepoints 1 and 2 are with conventional ventilation, and 3 and 4 are with INTELLiVENT-ASV.

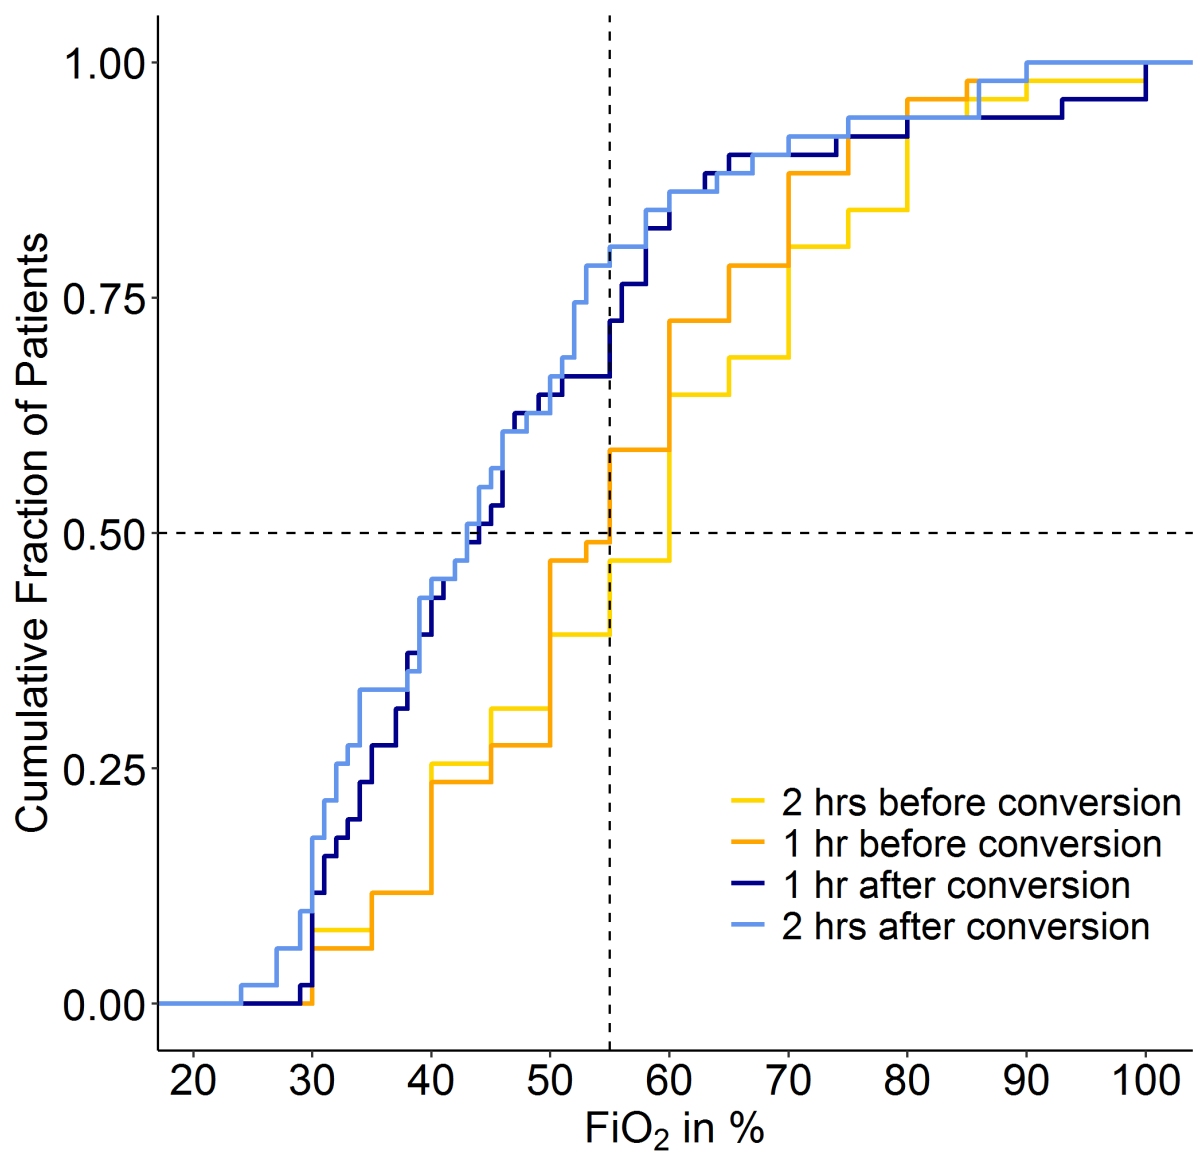

**Figure S3.** Cumulative frequency distribution of minute volume in liters. The plot shows minute volume from before to after the conversion between conventional ventilation and INTELLiVENT-ASV. Vertical dotted lines represent the median at the last hour before the conversion, and horizontal dotted lines show the respective proportion of patients reaching each cutoff.

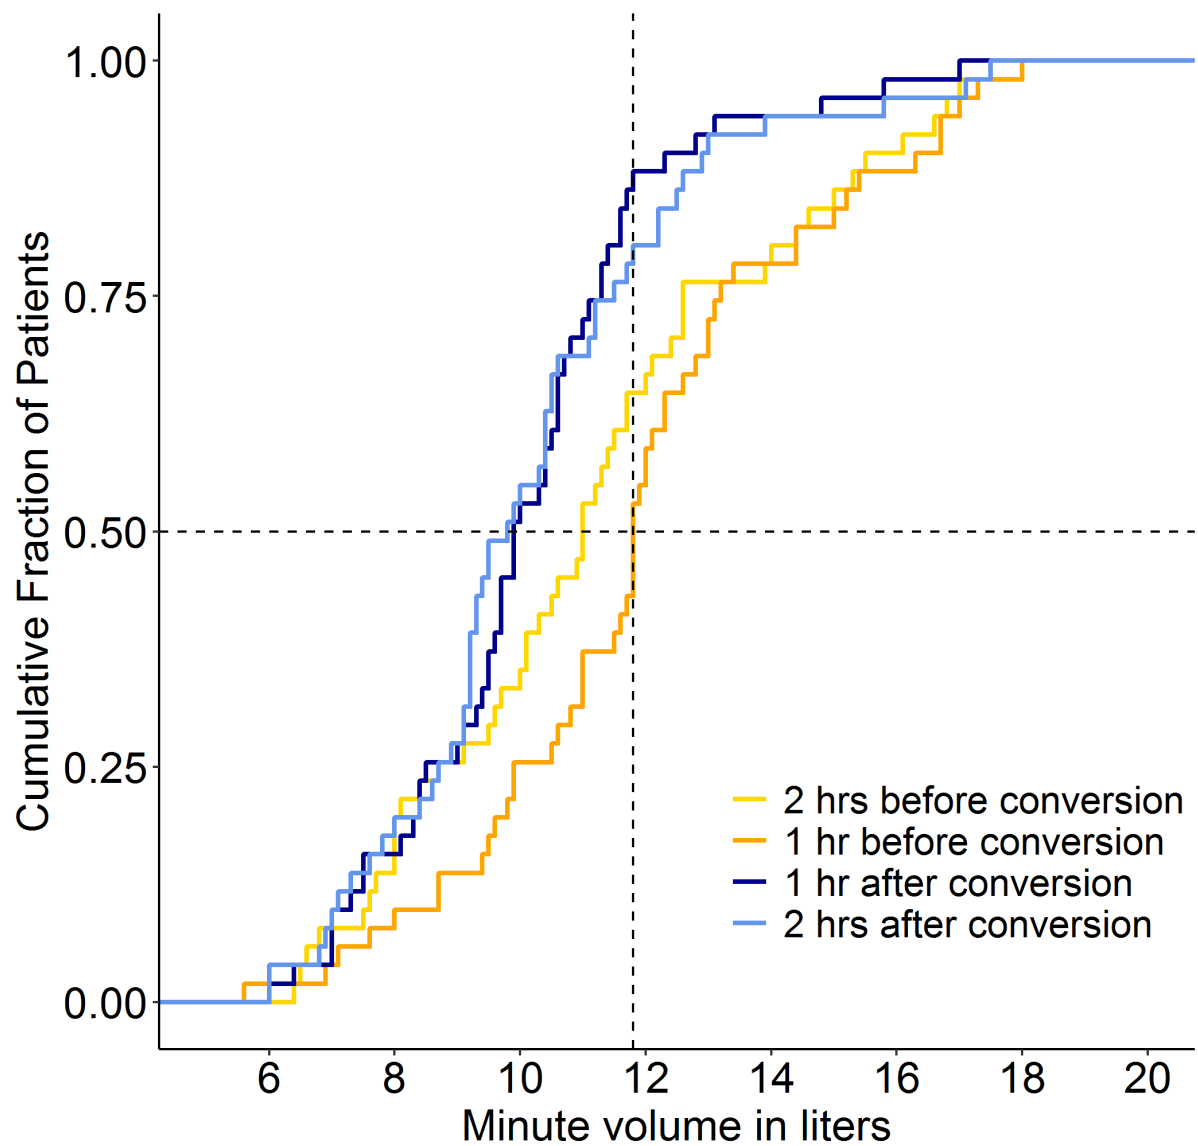

**Figure S4.** Cumulative frequency distribution of the fraction of inspired oxygen. The plot shows the  $\text{FiO}_2$  from before to after the conversion between conventional ventilation and INTELLiVENT-ASV. Vertical dotted lines represent the median at the last hour before the conversion, and horizontal dotted lines show the respective proportion of patients reaching each cutoff.

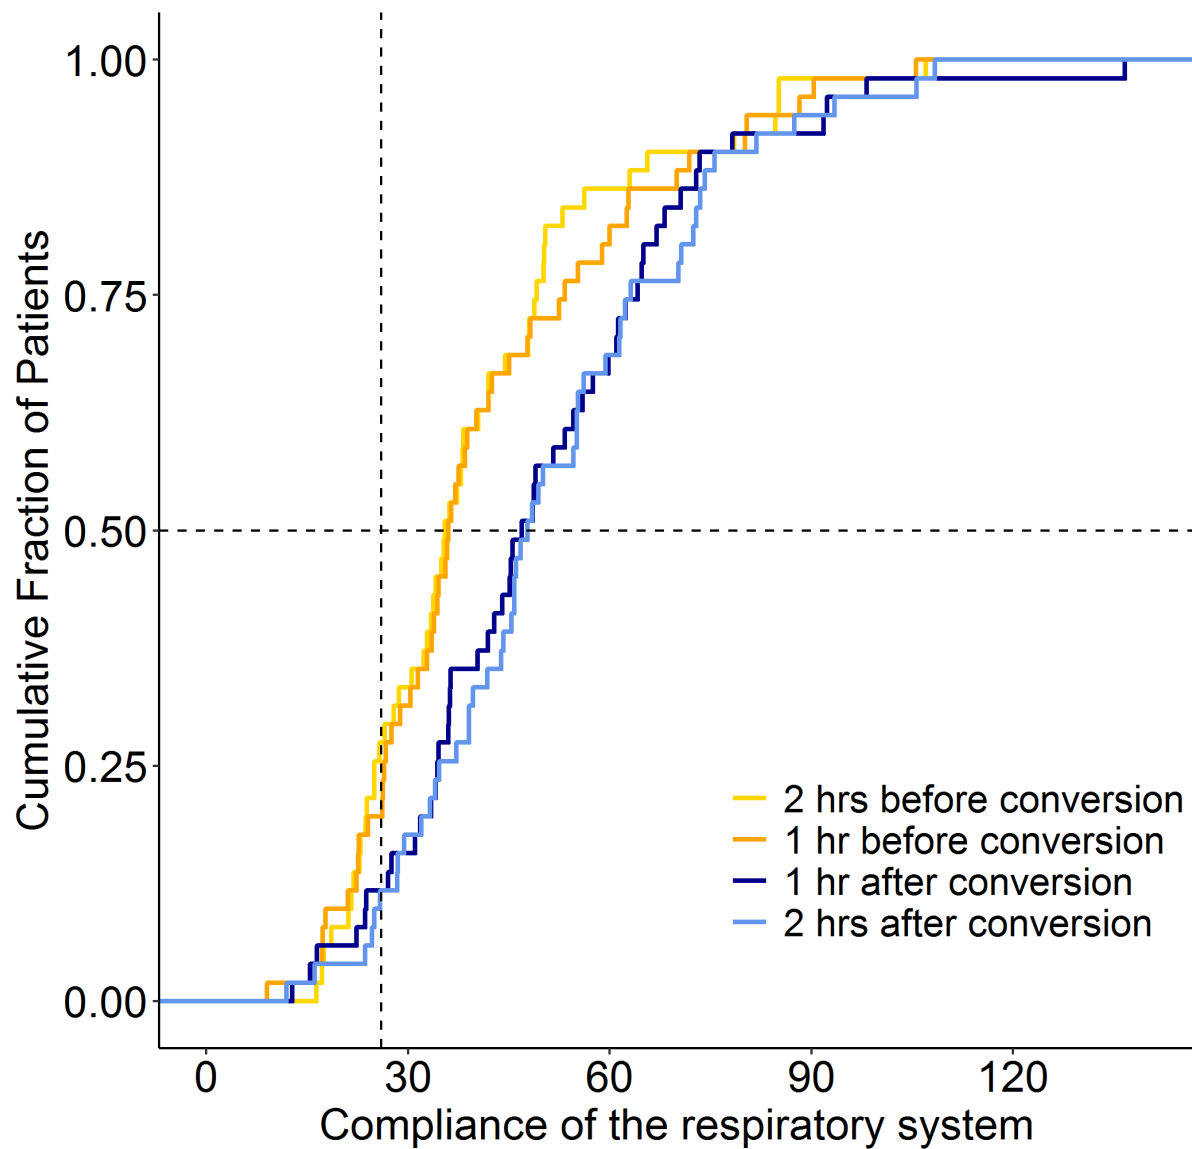

**Figure S5.** Cumulative frequency distribution of the compliance of the respiratory system in mL/cm H<sub>2</sub>O liters. The plot shows the C<sub>RS</sub> from before to after the conversion between conventional ventilation and INTELLiVENT-ASV. Vertical dotted lines represent the median at the last hour before the conversion, and horizontal dotted lines show the respective proportion of patients reaching each cutoff.

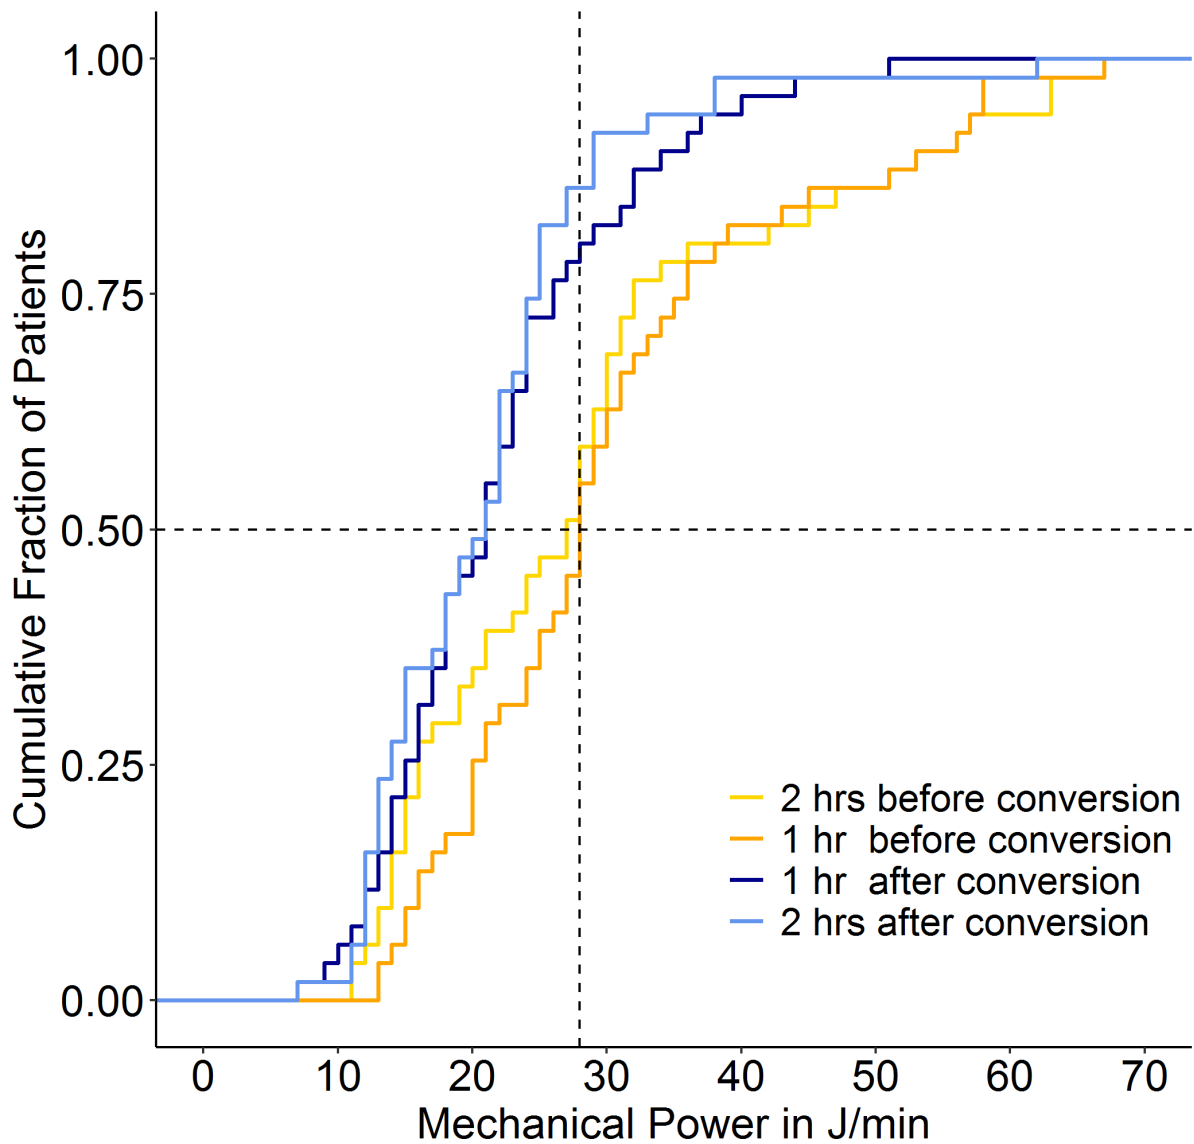

**Figure S6.** Cumulative frequency distribution of MP with an alternate equation. The plot shows MP from before to after the conversion between conventional ventilation and INTELLiVENT-ASV. Vertical dotted lines represent the median at the last hour before the conversion, and horizontal dotted lines show the respective proportion of patients reaching each cutoff. MP was calculated as  $0.098 \times RR \times V_T \times (P_{\text{insp}} + PEEP)$ .

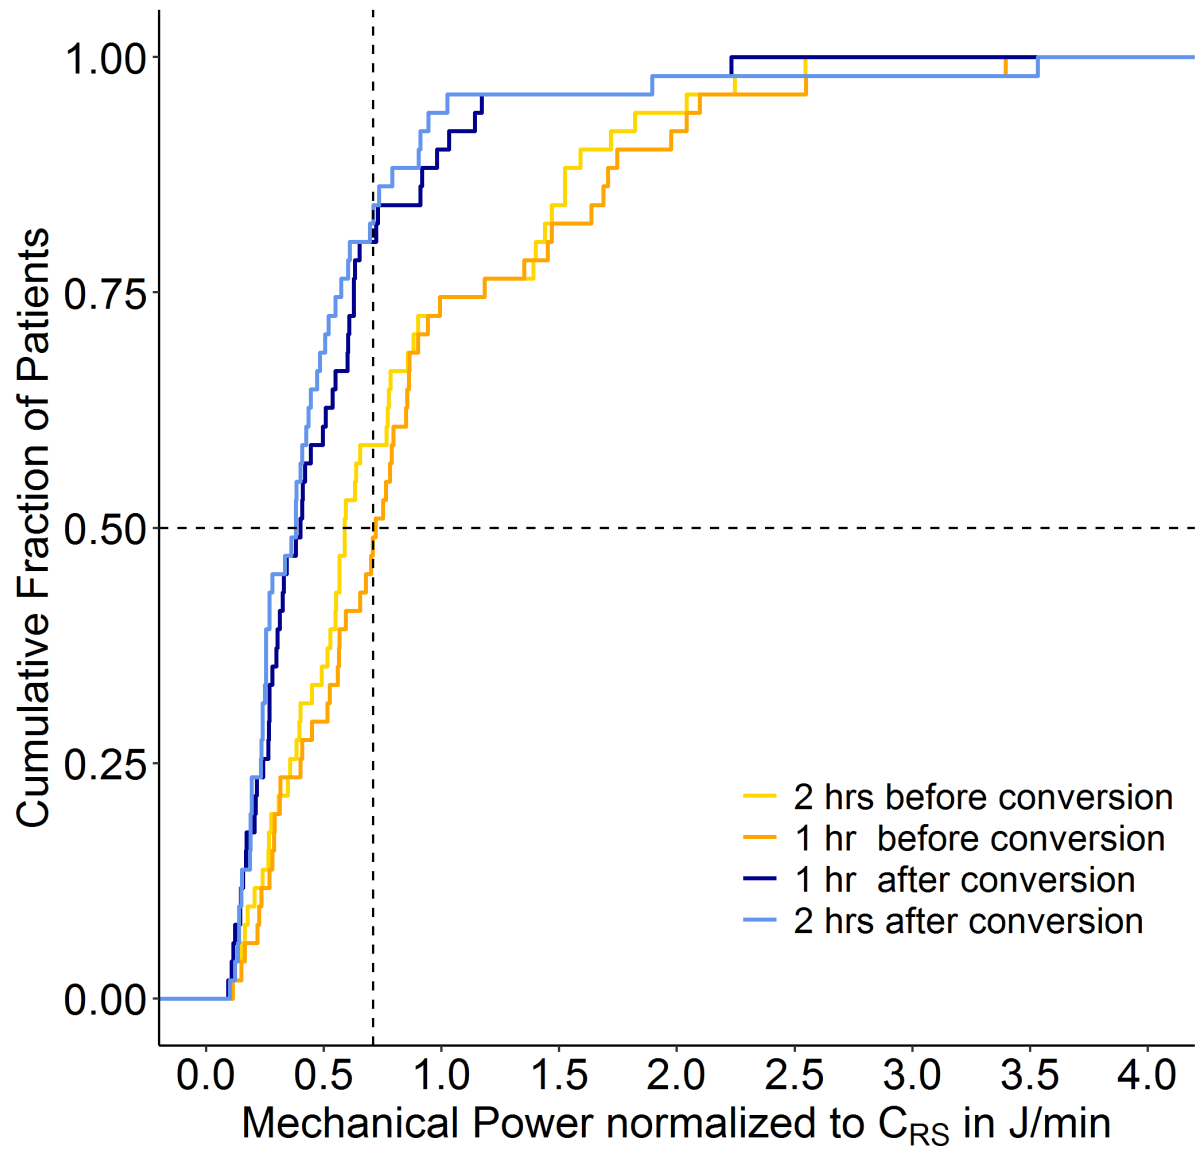

**Figure S7.** Cumulative frequency distribution of MP normalized to  $C_{RS}$ . The plot shows MP from before to after the conversion between conventional ventilation and INTELLiVENT-ASV. Vertical dotted lines represent the median at the last hour before the conversion, and horizontal dotted lines show the respective proportion of patients reaching each cutoff.  $C_{RS}$  (mL/cm H<sub>2</sub>O) =  $V_T/\Delta P$ , and  $MP_{NORM}$  (J/min per mL/cm H<sub>2</sub>O) =  $MP/C_{RS}$ .



**Table S1a.** Individual ventilation data of tidal volume.

| Study ID | Tidalvolume time point 1 | Tidalvolume time point 2 | Tidalvolume time point 3 | Tidalvolume time point 4 |
|----------|--------------------------|--------------------------|--------------------------|--------------------------|
| 1        | 420                      | 420                      | 501                      | 504                      |
| 2        | 504                      | 500                      | 551                      | 554                      |
| 3        | 468                      | 595                      | 777                      | 652                      |
| 4        | 400                      | 420                      | 560                      | 478                      |
| 5        | 400                      | 405                      | 568                      | 553                      |
| 6        | 420                      | 430                      | 561                      | 562                      |
| 7        | 481                      | 483                      | 427                      | 452                      |
| 8        | 450                      | 480                      | 438                      | 491                      |
| 9        | 464                      | 479                      | 468                      | 585                      |
| 10       | 450                      | 480                      | 600                      | 596                      |
| 11       | 397                      | 440                      | 435                      | 654                      |
| 12       | 402                      | 482                      | 484                      | 398                      |
| 13       | 501                      | 476                      | 646                      | 635                      |
| 14       | 600                      | 604                      | 516                      | 598                      |
| 15       | 459                      | 466                      | 544                      | 553                      |
| 16       | 530                      | 533                      | 671                      | 514                      |
| 17       | 485                      | 473                      | 468                      | 485                      |
| 18       | 420                      | 430                      | 496                      | 561                      |
| 19       | 543                      | 540                      | 683                      | 650                      |
| 20       | 477                      | 441                      | 468                      | 508                      |
| 21       | 502                      | 482                      | 583                      | 573                      |
| 22       | 360                      | 412                      | 534                      | 482                      |
| 23       | 350                      | 337                      | 405                      | 370                      |
| 24       | 420                      | 427                      | 403                      | 501                      |
| 25       | 360                      | 353                      | 231                      | 294                      |
| 26       | 439                      | 436                      | 436                      | 416                      |
| 27       | 424                      | 423                      | 444                      | 442                      |
| 28       | 596                      | 723                      | 626                      | 551                      |
| 29       | 384                      | 342                      | 383                      | 334                      |
| 30       | 359                      | 409                      | 331                      | 399                      |
| 31       | 537                      | 589                      | 538                      | 528                      |
| 32       | 591                      | 547                      | 536                      | 588                      |
| 33       | 487                      | 490                      | 515                      | 520                      |
| 34       | 681                      | 718                      | 551                      | 612                      |
| 35       | 624                      | 663                      | 480                      | 496                      |
| 36       | 381                      | 375                      | 460                      | 475                      |
| 37       | 383                      | 333                      | 455                      | 339                      |
| 38       | 417                      | 423                      | 545                      | 623                      |
| 39       | 567                      | 552                      | 539                      | 505                      |
| 40       | 413                      | 402                      | 477                      | 401                      |
| 41       | 403                      | 502                      | 546                      | 494                      |
| 42       | 749                      | 739                      | 646                      | 605                      |
| 43       | 393                      | 420                      | 503                      | 499                      |
| 44       | 387                      | 294                      | 513                      | 543                      |
| 45       | 677                      | 561                      | 449                      | 510                      |
| 46       | 656                      | 700                      | 589                      | 553                      |
| 47       | 484                      | 482                      | 577                      | 574                      |
| 48       | 418                      | 413                      | 518                      | 547                      |
| 49       | 375                      | 445                      | 635                      | 636                      |
| 50       | 628                      | 706                      | 587                      | 593                      |
| 51       | 367                      | 328                      | 357                      | 375                      |

**Table S1b.** Individual ventilation data of PEEP.

| Study ID | PEEP time point 1 | PEEP time point 2 | PEEP time point 3 | PEEP time point 4 |
|----------|-------------------|-------------------|-------------------|-------------------|
| 1        | 14                | 14                | 14                | 14                |
| 2        | 17                | 17                | 16                | 16                |
| 3        | 8                 | 8                 | 10                | 10                |
| 4        | 10                | 10                | 7                 | 5                 |
| 5        | 20                | 20                | 16                | 17                |
| 6        | 10                | 12                | 12                | 12                |
| 7        | 8                 | 8                 | 8                 | 8                 |
| 8        | 8                 | 9                 | 9                 | 10                |
| 9        | 8                 | 6                 | 6                 | 7                 |
| 10       | 16                | 16                | 12                | 12                |
| 11       | 8                 | 8                 | 8                 | 8                 |
| 12       | 8                 | 8                 | 8                 | 9                 |
| 13       | 5                 | 5                 | 8                 | 8                 |
| 14       | 8                 | 10                | 14                | 8                 |
| 15       | 10                | 10                | 8                 | 8                 |
| 16       | 12                | 12                | 12                | 12                |
| 17       | 16                | 14                | 13                | 12                |
| 18       | 10                | 12                | 14                | 12                |
| 19       | 10                | 10                | 12                | 12                |
| 20       | 16                | 16                | 14                | 14                |
| 21       | 12                | 12                | 12                | 11                |
| 22       | 14                | 16                | 16                | 16                |
| 23       | 8                 | 10                | 11                | 11                |
| 24       | 9                 | 12                | 12                | 11                |
| 25       | 10                | 10                | 12                | 12                |
| 26       | 12                | 12                | 12                | 11                |
| 27       | 12                | 12                | 12                | 12                |
| 28       | 10                | 10                | 12                | 11                |
| 29       | 7                 | 5                 | 8                 | 7                 |
| 30       | 7                 | 7                 | 10                | 9                 |
| 31       | 8                 | 8                 | 9                 | 11                |
| 32       | 10                | 10                | 10                | 10                |
| 33       | 12                | 12                | 10                | 10                |
| 34       | 12                | 10                | 10                | 12                |
| 35       | 5                 | 5                 | 7                 | 7                 |
| 36       | 10                | 8                 | 10                | 10                |
| 37       | 11                | 12                | 13                | 13                |
| 38       | 10                | 10                | 10                | 10                |
| 39       | 10                | 10                | 9                 | 10                |
| 40       | 15                | 15                | 15                | 12                |
| 41       | 14                | 14                | 15                | 15                |
| 42       | 8                 | 8                 | 8                 | 8                 |
| 43       | 10                | 10                | 10                | 6                 |
| 44       | 15                | 12                | 11                | 11                |
| 45       | 12                | 14                | 11                | 12                |
| 46       | 10                | 10                | 10                | 10                |
| 47       | 10                | 10                | 10                | 10                |
| 48       | 10                | 10                | 10                | 8                 |
| 49       | 5                 | 5                 | 12                | 12                |
| 50       | 8                 | 8                 | 10                | 10                |
| 51       | 12                | 10                | 10                | 10                |

**Table S1c.** Individual ventilation data of Pmax.

| Study ID | Pmax time point 1 | Pmax time point 2 | Pmax time point 3 | Pmax time point 4 |
|----------|-------------------|-------------------|-------------------|-------------------|
| 1        | 31                | 32                | 26                | 25                |
| 2        | 38                | 37                | 31                | 31                |
| 3        | 26                | 24                | 23                | 19                |
| 4        | 29                | 32                | 18                | 15                |
| 5        | 38                | 38                | 32                | 32                |
| 6        | 25                | 30                | 28                | 27                |
| 7        | 43                | 43                | 38                | 47                |
| 8        | 17                | 21                | 18                | 19                |
| 9        | 43                | 41                | 33                | 28                |
| 10       | 43                | 42                | 32                | 33                |
| 11       | 22                | 22                | 20                | 15                |
| 12       | 17                | 15                | 20                | 26                |
| 13       | 40                | 37                | 33                | 32                |
| 14       | 29                | 29                | 27                | 25                |
| 15       | 23                | 23                | 23                | 23                |
| 16       | 27                | 25                | 26                | 24                |
| 17       | 33                | 31                | 28                | 27                |
| 18       | 26                | 30                | 29                | 28                |
| 19       | 30                | 30                | 17                | 18                |
| 20       | 41                | 48                | 39                | 36                |
| 21       | 26                | 26                | 21                | 18                |
| 22       | 30                | 30                | 29                | 29                |
| 23       | 25                | 28                | 30                | 28                |
| 24       | 22                | 29                | 29                | 22                |
| 25       | 34                | 35                | 29                | 34                |
| 26       | 27                | 27                | 26                | 26                |
| 27       | 35                | 40                | 32                | 32                |
| 28       | 18                | 19                | 21                | 22                |
| 29       | 34                | 43                | 38                | 37                |
| 30       | 25                | 26                | 24                | 23                |
| 31       | 20                | 18                | 17                | 16                |
| 32       | 35                | 35                | 27                | 24                |
| 33       | 31                | 31                | 28                | 28                |
| 34       | 20                | 20                | 16                | 19                |
| 35       | 18                | 17                | 16                | 16                |
| 36       | 23                | 24                | 20                | 21                |
| 37       | 19                | 21                | 20                | 20                |
| 38       | 23                | 23                | 21                | 24                |
| 39       | 26                | 30                | 20                | 18                |
| 40       | 43                | 43                | 37                | 30                |
| 41       | 22                | 22                | 29                | 28                |
| 42       | 15                | 15                | 15                | 16                |
| 43       | 23                | 23                | 22                | 17                |
| 44       | 39                | 33                | 42                | 40                |
| 45       | 20                | 21                | 18                | 19                |
| 46       | 20                | 20                | 16                | 19                |
| 47       | 28                | 29                | 26                | 23                |
| 48       | 27                | 26                | 26                | 22                |
| 49       | 20                | 22                | 21                | 21                |
| 50       | 20                | 20                | 18                | 18                |
| 51       | 35                | 36                | 27                | 28                |

**Table S1d** Individual ventilation data of Pplat.

| Study ID | Pplat time point 1 | Pplat time point 2 | Pplat time point 3 | Pplat time point 4 |
|----------|--------------------|--------------------|--------------------|--------------------|
| 1        | 26                 | 26                 | 24                 | 24                 |
| 2        | 25                 | 25                 | 25                 | 25                 |
| 3        | 23                 | 22                 | 22                 | 19                 |
| 4        | 26                 | 26                 | 17                 | 15                 |
| 5        | 29                 | 29                 | 27                 | 27                 |
| 6        | 20                 | 21                 | 21                 | 20                 |
| 7        | 36                 | 36                 | 34                 | 36                 |
| 8        | 16                 | 17                 | 18                 | 19                 |
| 9        | 33                 | 33                 | 23                 | 21                 |
| 10       | 35                 | 34                 | 26                 | 25                 |
| 11       | 21                 | 21                 | 20                 | 15                 |
| 12       | 16                 | 14                 | 19                 | 23                 |
| 13       | 26                 | 26                 | 24                 | 24                 |
| 14       | 25                 | 25                 | 25                 | 25                 |
| 15       | 22                 | 22                 | 20                 | 20                 |
| 16       | 22                 | 22                 | 23                 | 23                 |
| 17       | 28                 | 27                 | 26                 | 26                 |
| 18       | 22                 | 24                 | 25                 | 22                 |
| 19       | 25                 | 25                 | 17                 | 18                 |
| 20       | 30                 | 30                 | 28                 | 27                 |
| 21       | 22                 | 22                 | 20                 | 18                 |
| 22       | 28                 | 28                 | 27                 | 27                 |
| 23       | 24                 | 26                 | 26                 | 25                 |
| 24       | 22                 | 25                 | 25                 | 21                 |
| 25       | 32                 | 32                 | 27                 | 31                 |
| 26       | 25                 | 25                 | 24                 | 24                 |
| 27       | 28                 | 28                 | 25                 | 25                 |
| 28       | 17                 | 18                 | 20                 | 21                 |
| 29       | 29                 | 43                 | 38                 | 35                 |
| 30       | 24                 | 24                 | 24                 | 24                 |
| 31       | 19                 | 18                 | 17                 | 16                 |
| 32       | 28                 | 28                 | 18                 | 18                 |
| 33       | 29                 | 29                 | 25                 | 24                 |
| 34       | 20                 | 20                 | 16                 | 19                 |
| 35       | 18                 | 17                 | 16                 | 16                 |
| 36       | 20                 | 18                 | 18                 | 18                 |
| 37       | 19                 | 21                 | 20                 | 20                 |
| 38       | 21                 | 21                 | 18                 | 20                 |
| 39       | 26                 | 26                 | 20                 | 18                 |
| 40       | 33                 | 33                 | 30                 | 29                 |
| 41       | 22                 | 22                 | 25                 | 25                 |
| 42       | 15                 | 15                 | 15                 | 16                 |
| 43       | 18                 | 18                 | 22                 | 17                 |
| 44       | 32                 | 25                 | 34                 | 32                 |
| 45       | 20                 | 21                 | 18                 | 19                 |
| 46       | 20                 | 20                 | 16                 | 19                 |
| 47       | 23                 | 22                 | 26                 | 23                 |
| 48       | 25                 | 26                 | 25                 | 22                 |
| 49       | 20                 | 22                 | 21                 | 21                 |
| 50       | 16                 | 16                 | 18                 | 18                 |
| 51       | 29                 | 29                 | 25                 | 25                 |

**Table S1e.** Individual ventilation data of the respiratory rate.

| Study ID | RR time point 1 | RR time point 2 | RR time point 3 | RR time point 4 |
|----------|-----------------|-----------------|-----------------|-----------------|
| 1        | 30              | 30              | 19              | 19              |
| 2        | 33              | 33              | 19              | 19              |
| 3        | 30              | 30              | 17              | 21              |
| 4        | 16              | 18              | 21              | 19              |
| 5        | 40              | 40              | 21              | 16              |
| 6        | 25              | 25              | 15              | 14              |
| 7        | 32              | 32              | 35              | 39              |
| 8        | 16              | 20              | 14              | 15              |
| 9        | 23              | 24              | 24              | 15              |
| 10       | 36              | 36              | 21              | 21              |
| 11       | 30              | 30              | 17              | 17              |
| 12       | 20              | 21              | 19              | 18              |
| 13       | 30              | 30              | 16              | 16              |
| 14       | 25              | 22              | 27              | 26              |
| 15       | 20              | 20              | 19              | 19              |
| 16       | 16              | 16              | 12              | 12              |
| 17       | 20              | 25              | 20              | 20              |
| 18       | 25              | 25              | 20              | 18              |
| 19       | 30              | 30              | 15              | 21              |
| 20       | 30              | 30              | 26              | 24              |
| 21       | 25              | 25              | 11              | 15              |
| 22       | 20              | 30              | 16              | 19              |
| 23       | 22              | 30              | 22              | 23              |
| 24       | 20              | 30              | 22              | 20              |
| 25       | 28              | 28              | 37              | 32              |
| 26       | 25              | 25              | 21              | 23              |
| 27       | 36              | 34              | 28              | 29              |
| 28       | 24              | 19              | 18              | 23              |
| 29       | 29              | 38              | 28              | 30              |
| 30       | 28              | 27              | 26              | 23              |
| 31       | 17              | 17              | 14              | 15              |
| 32       | 32              | 32              | 18              | 17              |
| 33       | 24              | 24              | 20              | 18              |
| 34       | 14              | 19              | 12              | 13              |
| 35       | 18              | 18              | 12              | 12              |
| 36       | 31              | 30              | 17              | 19              |
| 37       | 26              | 36              | 18              | 21              |
| 38       | 30              | 30              | 20              | 15              |
| 39       | 20              | 25              | 21              | 23              |
| 40       | 34              | 34              | 15              | 17              |
| 41       | 27              | 22              | 17              | 16              |
| 42       | 14              | 14              | 18              | 16              |
| 43       | 30              | 30              | 16              | 15              |
| 44       | 30              | 40              | 15              | 13              |
| 45       | 12              | 24              | 17              | 13              |
| 46       | 10              | 11              | 15              | 15              |
| 47       | 13              | 15              | 19              | 18              |
| 48       | 27              | 28              | 15              | 12              |
| 49       | 30              | 32              | 18              | 16              |
| 50       | 22              | 23              | 19              | 21              |
| 51       | 36              | 40              | 32              | 34              |

**Table S1f.** Individual ventilation data of tidal volume in ml/kg PBW.

| Stud IDy | Tidalvolume_mlkg time<br>point 1 | Tidalvolume_mlkg time<br>point 2 | Tidalvolume_mlkg time<br>point 3 | Tidalvolume_mlkg time<br>point 4 |
|----------|----------------------------------|----------------------------------|----------------------------------|----------------------------------|
| 1        | 5,9                              | 5,9                              | 7,10                             | 7,1                              |
| 2        | 6,3                              | 6,3                              | 6,80                             | 6,8                              |
| 3        | 5,2                              | 6,6                              | 8,60                             | 7,2                              |
| 4        | 5,9                              | 5,9                              | 8,20                             | 7,0                              |
| 5        | 5,9                              | 5,9                              | 8,40                             | 8,1                              |
| 6        | 5,4                              | 6,0                              | 7,80                             | 7,8                              |
| 7        | 6,4                              | 6,4                              | 5,70                             | 6,0                              |
| 8        | 6,0                              | 6,4                              | 5,80                             | 6,5                              |
| 9        | 6,8                              | 7,0                              | 6,90                             | 8,6                              |
| 10       | 6,0                              | 6,4                              | 8,00                             | 7,9                              |
| 11       | 5,7                              | 6,3                              | 6,20                             | 9,3                              |
| 12       | 5,9                              | 7,1                              | 7,10                             | 5,9                              |
| 13       | 7,1                              | 6,7                              | 9,10                             | 8,9                              |
| 14       | 6,5                              | 6,6                              | 5,60                             | 6,5                              |
| 15       | 6,1                              | 6,2                              | 7,30                             | 7,4                              |
| 16       | 5,9                              | 5,9                              | 7,50                             | 5,4                              |
| 17       | 6,3                              | 6,1                              | 6,10                             | 6,3                              |
| 18       | 5,8                              | 6,0                              | 6,90                             | 7,8                              |
| 19       | 7,2                              | 7,2                              | 9,10                             | 8,7                              |
| 20       | 6,0                              | 5,5                              | 5,90                             | 6,4                              |
| 21       | 5,7                              | 5,5                              | 6,60                             | 6,5                              |
| 22       | 5,1                              | 5,9                              | 7,60                             | 6,9                              |
| 23       | 6,7                              | 6,5                              | 7,80                             | 7,1                              |
| 24       | 5,8                              | 5,8                              | 5,50                             | 6,9                              |
| 25       | 7,3                              | 7,2                              | 4,70                             | 6,0                              |
| 26       | 6,7                              | 6,7                              | 6,70                             | 6,3                              |
| 27       | 6,8                              | 6,8                              | 7,20                             | 7,1                              |
| 28       | 7,9                              | 9,6                              | 8,30                             | 7,3                              |
| 29       | 5,8                              | 5,2                              | 5,80                             | 5,1                              |
| 30       | 6,5                              | 7,4                              | 6,00                             | 7,3                              |
| 31       | 7,6                              | 7,8                              | 7,60                             | 7,6                              |
| 32       | 7,0                              | 6,5                              | 6,40                             | 7,0                              |
| 33       | 6,7                              | 6,7                              | 7,10                             | 7,1                              |
| 34       | 11,0                             | 11,6                             | 8,90                             | 9,9                              |
| 35       | 8,7                              | 9,2                              | 6,70                             | 6,9                              |
| 36       | 5,3                              | 5,2                              | 6,40                             | 6,6                              |
| 37       | 7,4                              | 6,4                              | 8,80                             | 6,5                              |
| 38       | 4,8                              | 5,0                              | 6,30                             | 7,2                              |
| 39       | 8,9                              | 8,6                              | 8,40                             | 7,9                              |
| 40       | 7,2                              | 7,1                              | 8,40                             | 7,0                              |
| 41       | 5,0                              | 6,2                              | 6,70                             | 6,1                              |
| 42       | 8,9                              | 8,8                              | 7,70                             | 7,2                              |
| 43       | 4,9                              | 5,2                              | 6,20                             | 6,2                              |
| 44       | 4,8                              | 4,0                              | 6,40                             | 6,8                              |
| 45       | 9,8                              | 8,0                              | 6,40                             | 7,3                              |
| 46       | 9,4                              | 10,0                             | 8,40                             | 7,9                              |
| 47       | 6,5                              | 6,4                              | 7,70                             | 7,7                              |
| 48       | 6,6                              | 6,6                              | 8,20                             | 8,7                              |
| 49       | 5,0                              | 5,9                              | 8,50                             | 8,5                              |
| 50       | 8,8                              | 9,9                              | 8,20                             | 8,4                              |
| 51       | 5,6                              | 5,0                              | 5,40                             | 5,7                              |

**Table S1g.**Individual ventilation data of the P/F ratio at the baseline.

| Study ID | PF ratio |
|----------|----------|
| 1        | 108      |
| 2        | 157      |
| 3        | 167      |
| 4        | 89       |
| 5        | 125      |
| 6        | 85       |
| 7        | 141      |
| 8        | 74       |
| 9        | 333      |
| 10       | 140      |
| 11       | 215      |
| 12       | 121      |
| 13       | 198      |
| 14       | 95       |
| 15       | 158      |
| 16       | 165      |
| 17       | 126      |
| 18       | 98       |
| 19       | 165      |
| 20       | 98       |
| 21       | 135      |
| 22       | 150      |
| 23       | 112      |
| 24       | 93       |
| 25       | 168      |
| 26       | 227      |
| 27       | 138      |
| 28       | 94       |
| 29       | 107      |
| 30       | 139      |
| 31       | 68       |
| 32       | 101      |
| 33       | 94       |
| 34       | 65       |
| 35       | 221      |
| 36       | 129      |
| 37       | 203      |
| 38       | 113      |
| 39       | 88       |
| 40       | 100      |
| 41       | 92       |
| 42       | 230      |
| 43       | 189      |
| 44       | 104      |
| 45       | 83       |
| 46       | 85       |
| 47       | 137      |
| 48       | 125      |
| 49       | 231      |
| 50       | 118      |
| 51       | 95       |

**Table S1h.** Individual ventilation data of calculated compliance of the respiratory system.

| Study ID | CRS time point 1 | CRS time point 2 | CRS time point 3 | CRS time point 4 |
|----------|------------------|------------------|------------------|------------------|
| 1        | 42,00            | 42,00            | 45,55            | 45,82            |
| 2        | 63,00            | 62,50            | 61,22            | 61,56            |
| 3        | 33,43            | 42,50            | 64,75            | 72,44            |
| 4        | 25,00            | 26,25            | 56,00            | 47,80            |
| 5        | 44,44            | 45,00            | 51,64            | 55,30            |
| 6        | 42,00            | 47,78            | 62,33            | 70,25            |
| 7        | 17,18            | 17,25            | 16,42            | 16,14            |
| 8        | 56,25            | 60,00            | 48,67            | 54,56            |
| 9        | 18,56            | 17,74            | 27,53            | 41,79            |
| 10       | 23,68            | 26,67            | 42,86            | 45,85            |
| 11       | 30,54            | 33,85            | 36,25            | 93,43            |
| 12       | 50,25            | 80,33            | 44,00            | 28,43            |
| 13       | 23,86            | 22,67            | 40,38            | 39,69            |
| 14       | 35,29            | 35,53            | 46,91            | 33,22            |
| 15       | 38,25            | 38,83            | 45,33            | 46,08            |
| 16       | 53,00            | 53,30            | 61,00            | 46,73            |
| 17       | 40,42            | 36,38            | 36,00            | 34,64            |
| 18       | 35,00            | 35,83            | 45,09            | 56,10            |
| 19       | 36,20            | 36,00            | 136,60           | 108,33           |
| 20       | 34,07            | 31,50            | 33,43            | 39,08            |
| 21       | 50,20            | 48,20            | 72,88            | 81,86            |
| 22       | 25,71            | 34,33            | 48,55            | 43,82            |
| 23       | 21,88            | 21,06            | 27,00            | 24,67            |
| 24       | 32,31            | 32,85            | 31,00            | 50,10            |
| 25       | 16,36            | 16,05            | 15,40            | 29,40            |
| 26       | 33,77            | 33,54            | 36,33            | 32,00            |
| 27       | 26,50            | 26,44            | 34,15            | 34,00            |
| 28       | 85,14            | 90,38            | 78,25            | 55,10            |
| 29       | 17,45            | 9,00             | 12,77            | 11,93            |
| 30       | 21,12            | 24,06            | 23,64            | 28,50            |
| 31       | 48,82            | 58,90            | 59,78            | 105,60           |
| 32       | 32,83            | 30,39            | 67,00            | 73,50            |
| 33       | 28,65            | 28,82            | 34,33            | 37,14            |
| 34       | 85,13            | 71,80            | 91,83            | 87,43            |
| 35       | 48,00            | 55,25            | 53,33            | 55,11            |
| 36       | 38,10            | 37,50            | 57,50            | 59,38            |
| 37       | 47,88            | 37,00            | 65,00            | 48,43            |
| 38       | 37,91            | 38,45            | 68,13            | 62,30            |
| 39       | 35,44            | 34,50            | 49,00            | 63,13            |
| 40       | 22,94            | 22,33            | 31,80            | 23,59            |
| 41       | 50,38            | 62,75            | 54,60            | 49,40            |
| 42       | 107,00           | 105,57           | 92,29            | 75,63            |
| 43       | 49,13            | 52,50            | 41,92            | 45,36            |
| 44       | 22,76            | 22,62            | 22,30            | 25,86            |
| 45       | 84,63            | 80,14            | 64,14            | 72,86            |
| 46       | 65,60            | 70,00            | 98,17            | 61,44            |
| 47       | 37,23            | 40,17            | 36,06            | 44,15            |
| 48       | 27,87            | 27,53            | 34,53            | 39,07            |
| 49       | 25,00            | 26,18            | 70,56            | 70,67            |
| 50       | 78,50            | 88,25            | 73,38            | 74,13            |
| 51       | 21,59            | 17,26            | 23,80            | 25,00            |
